# Supplementary material for: Effects of Trace Elements on the Fatty Acid Composition in Danubian Fish Species
Source: MDPI journal article supplement (doi:10.3390/ani14060954), 2024-03-19
Supplement: s1 [file s1]

## Article

# Effects of Trace Elements on the Fatty Acid Composition in Danubian Fish Species

Katarina Jovičić <sup>1,\*</sup>, Vesna Djikanović <sup>1</sup>, Isidora Santrač <sup>2</sup>, Sanja Živković <sup>3</sup>, Milena Dimitrijević <sup>2</sup> and Jelena S Vranković <sup>1</sup>

- <sup>1</sup> University of Belgrade, Institute for Biological Research “Siniša Stanković”—National Institute of Republic of Serbia, Department of Hydroecology and Water Protection, Bulevar despota Stefana 142, 11060 Belgrade, Serbia
- <sup>2</sup> University of Belgrade—Institute for Multidisciplinary Research, Life Sciences Department, Kneza Višeslava 1, 11000 Belgrade, Serbia
- <sup>3</sup> University of Belgrade, “Vinča” Institute of Nuclear Sciences—National Institute of the Republic of Serbia, Department of Physical Chemistry, 11351 Belgrade, Serbia
- \* Correspondence: katarina.jovicic@ibiss.bg.ac.rs

**Table S1.** Number, size, and age of the two fish species sampled for each sampling site.

|                    | Veliko Ratno ostrvo |                    | Višnjica          |                                |
|--------------------|---------------------|--------------------|-------------------|--------------------------------|
|                    | <i>R. rutilus</i>   | <i>B. bjoerkna</i> | <i>R. rutilus</i> | <i>B. bjoerkna</i>             |
| <b>Length (cm)</b> |                     |                    |                   |                                |
| Min – max          | 27.0–29.0           | 30.2–34.0          | 24.0–27.0         | 22.0–27.5                      |
| Average            | 28.05               | 32.25              | 25.3              | 24.87                          |
| <b>Weight (g)</b>  |                     |                    |                   |                                |
| Min – max          | 360.0–400.0         | 400.0–780.0        | 200.0–300.0       | 190.0–390.0                    |
| Average            | 380.0               | 607.5              | 247.5             | 267.5                          |
| Age                | 4 <sup>+</sup>      | 5 <sup>+</sup>     | 4 <sup>+</sup>    | 3 <sup>+</sup> –4 <sup>+</sup> |

**Table S2.** The operational parameters of the ICP-OES instrument (iCAP 7400 Duo Thermo Fisher Scientific).

| Parameter                   | iCAP 7400   |
|-----------------------------|-------------|
| RF generator power          | 1150 W      |
| RF generator frequency      | 27.12 MHz   |
| Detector                    | CID86 chip  |
| Results processing software | iTEVA iCAP  |
| Mode for processing results | Peak height |
| Background correction       | Manual      |

**Table S3.** Correlations of body length with metal and trace element concentrations in white bream and roach ( $p < 0.05$ ).

| Element | Total length (TL) |           |
|---------|-------------------|-----------|
|         | White bream       | Roach     |
| As      | 0.711866*         | −0.46131  |
| Cr      | −0.21371          | −0.42447  |
| Cu      | −0.01916          | −0.47753  |
| Hg      | 0.570377*         | −0.05895  |
| Ni      | 0.449522          | −0.13265  |
| Pb      | 0.29646           | −0.33898  |
| *n      | −0.30951          | −0.65586* |

\* Statistically significant correlations are marked in bold and with asterisk.

**Table S4.** Correlations of body length with fatty acids (FA) profiles in white bream ( $p < 0.05$ ).

| FA    | Total length (TL) |
|-------|-------------------|
| C12:0 | -0.5766           |
| C13:0 | <b>0.79283*</b>   |
| C14:0 | -0.50453          |
| C14:1 | <b>0.79283*</b>   |
| C14:1 | <b>0.88292*</b>   |
| C16:0 | 0.738769          |
| C16:1 | -0.23424          |
| C17:0 | -0.73877          |
| C18:0 | -0.45047          |
| C18:1 | <b>0.918956*</b>  |
| C18:1 | <b>-0.99103*</b>  |
| C18:2 | 0.162169          |
| 18:2  | 0.198206          |
| C18:3 | -0.10811          |
| C20:0 | 0.324337          |
| C20:1 | <b>-0.84688*</b>  |
| C20:2 | -0.39641          |
| C20:3 | -0.48651          |
| C20:4 | -0.16217          |
| 20:4  | 0.072075          |
| C20:5 | -0.39641          |
| C23:6 | 0.252262          |

\* Statistically significant correlations are marked in bold and with asterisk.
